# Supplementary material
Source: publisher site journal article supplement (https://www.dovepress.com/article/505674)
Supplement: Supplementary file 1 [file get_supplementary_file.php]

**Supplementary materials**

**Supplementary Figure 1** Evaluation of native vascular tissue before and after decellularization. HE and DAPI fluorescence staining were used to assess the decellularization status of native vascular tissue. In the DAPI group, the region between the two white dashed lines represents the vascular wall. Scale bar: 50 µm.

**Supplementary Figure 2** Effect of different mass concentrations of nanoparticles (NPs) on macrophage activity in vitro. Experimental groups: Control (blank control), PNPs, and Qu@PNPs. Quantitative analysis of cell viability changes in rat BMDMs after 24 h of intervention with gradient mass concentrations of NPs, as determined by the CCK-8 assay (n=5). Data are presented as mean value ± standard error of the mean; ns: not significant (not shown in the figure).

**Supplementary Figure 3** Presence of nanoparticles in modified dTEVG in the AVG model. Fluorescence distribution of RB@PNPs (red under fluorescence microscopy) in modified dTEVG at 0 h, 24 h, and 72 h post-implantation. Blue indicates cell nuclei. L (lumen side), M (media), and A (adventitia) are labeled. The area between the white dashed lines represents the graft interior. Scale bar: 50 µm.

**Supplementary Figure 4** Effect of modified dTEVG on rat organ tissues in the AVG model. Experimental groups: Control (unmodified dTEVG), PNPs (PNPs-dTEVG), Qu (Qu-dTEVG), and Qu@PNPs (Qu@PNPs-dTEVG). HE staining was used to detect morphological changes in the liver, kidney, and spleen of rats at day 21. Scale bar: 50 µm.

**Supplementary Figure 5** Recellularization of grafts in the AVG model. Experimental groups: Control (unmodified dTEVG), PNPs (PNPs-dTEVG), Qu (Qu-dTEVG), and Qu@PNPs (Qu@PNPs-dTEVG). Immunofluorescence staining of CD31+ (green) and α-SMA+ (red) cells in grafts at day 21. The area between the white dashed lines indicates the graft interior. White arrows denote α-SMA+ cells, and blue represents cell nuclei. Scale bar: 50 µm.
